# Supplementary material for: The tip of the iceberg: extraordinarily high diversity while examining two infralittoral nematode communities on Okinawa-jima Island, Japan, using morphology and DNA barcoding
Source: PeerJ. 2025 Jul 30;13:e19757. doi: 10.7717/peerj.19757 (PMC12317692; doi:10.7717/peerj.19757)
Supplement: Supplemental Information 1 [file peerj-13-19757-s001.xlsx]

## Sheet: 18S
Accension number	Species	Marker	Length (bp)	Reference
OP137155	Acanthopharynx micans	rRNA small subunit18S	861	Tchesunov,A., Garcia,P.R., Simakova,U. and Mokievsky,V. Acanthopharynx Marine Nematodes (Nematoda, Chromadoria, Desmodoridae) Dwelling in Tropical Demosponges: Integrative Taxonomy with Description of a New Species Diversity (Basel) 15 (1), 48 (2023)
HM564627	Anticoma sp.	rRNA small subunit18S	1650	Bik,H.M., Thomas,W.K., Lunt,D.H. and Lambshead,P.J. Low endemism, continued deep-shallow interchanges, and evidence for cosmopolitan distributions in free-living marine nematodes (order Enoplida) BMC Evol. Biol. 10 (1), 389 (2010)
HM564616	Anticomidae sp.	rRNA small subunit18S	1617	Bik,H.M., Thomas,W.K., Lunt,D.H. and Lambshead,P.J. Low endemism, continued deep-shallow interchanges, and evidence for cosmopolitan distributions in free-living marine nematodes (order Enoplida) BMC Evol. Biol. 10 (1), 389 (2010)
OR590892	Ascolaimus elongatus	rRNA small subunit18S	1682	Ahmed,M., Nascimento,F. and Holovachov,O. Direct Submission. Submitted (21-SEP-2023) Zoology, Swedish Museum of Natural History, Freskativagen 40, Stockholm 11418, Sweden
OQ396725	Axonolaimus arcuatus	rRNA small subunit18S	1706	Chu,M.D., Sun,J. and Huang,Y. Direct Submission Submitted (06-FEB-2023) College of Life Science, Liaocheng University, 1 Hunan Road, Liaocheng, Shandong 252000, China
AJ966476	Bathylaimus assimilis	rRNA small subunit18S	1812	Meldal,B.H., Debenham,N.J., De Ley,P., De Ley,I.T., Vanfleteren,J.R., Vierstraete,A.R., Bert,W., Borgonie,G., Moens,T., Tyler,P.A., Austen,M.C., Blaxter,M.L., Rogers,A.D. and Lambshead,P.J. An improved molecular phylogeny of the Nematoda with special emphasis on marine taxa. Mol. Phylogenet. Evol. 42 (3), 622-636 (2007)
MG669696	Bathylaimus australis	rRNA small subunit18S	955	Macheriotou,L., Guilini,K., Nara Bezerra,T., Tytgat,B., Tu Nguyen,D., Xuan Phuong Nguyen,T., Noppe,F., Armenteros,M.,Boufahja,F., Vanreusel,A. and Derycke,S. Reaching the species level: Metabarcoding free-living marine nematodes using curated 18S and CO1 reference sequence databases. Unpublished
KU746881	Cheironchus haurakiensis	rRNA small subunit18S	848	Leduc,D. and Zhao,Z.Q.Molecular characterisation of five nematode species (Chromadorida, Selachinematidae) from shelf and upper slope sediments off New Zealand, with description of three new species Zootaxa 4132 (1), 59-76 (2016)
OR590912	Chromadorella filiformis	rRNA small subunit18S	1644	Ahmed,M., Nascimento,F. and Holovachov,O. Direct Submission. Submitted (21-SEP-2023) Zoology, Swedish Museum of Natural History, Freskativagen 40, Stockholm 11418, Sweden
OK317205	Chromaspirina stilbonematinops	rRNA small subunit18S	1538	Leduc,D. and Zhao,Z. Common free-living nematodes of Pauatahanui Inlet (Nematoda), the Marine Fauna of New Zealand Unpublished
OK317205	Chromaspirina stilbonematinops	rRNA small subunit18S	1538	Leduc,D. and Zhao,Z. Common free-living nematodes of Pauatahanui Inlet (Nematoda), the Marine Fauna of New Zealand Unpublished
OR591021	Daptonema sp.	rRNA small subunit18S	919	Ahmed,M., Nascimento,F. and Holovachov,O. Direct Submission. Submitted (21-SEP-2023) Zoology, Swedish Museum of Natural History, Freskativagen 40, Stockholm 11418, Sweden
OR590919	Denticulella sp.	rRNA small subunit18S	1687	Ahmed,M., Nascimento,F. and Holovachov,O. Direct Submission. Submitted (21-SEP-2023) Zoology, Swedish Museum of Natural History, Freskativagen 40, Stockholm 11418, Sweden
EF591333	Desmolaimus sp.	rRNA small subunit18S	1699	Holterman,M., Holovachov,O., van den Elsen,S., van Megen,H., Bongers,T., Bakker,J. and Helder,J. Small subunit ribosomal DNA-based phylogeny of basal Chromadoria (Nematoda) suggests that transitions from marine to terrestrial habitats (and vice versa) require relatively simple adaptations. Mol. Phylogenet. Evol. 48 (2), 758-763 (2008)
OR590923	Dichromadora sp.	rRNA small subunit18S	1677	Ahmed,M., Nascimento,F. and Holovachov,O. Direct Submission. Submitted (21-SEP-2023) Zoology, Swedish Museum of Natural History, Freskativagen 40, Stockholm 11418, Sweden
FJ182219	Draconematidae	rRNA small subunit18S	1691	Rho,H.S., Decraemer,W., Sorensen,M.V., Min,W.G., Jung,J. and Kim,W. Megadraconema cornutum, a New Genus and Species from Korea, with a Discussion of Its Classification and Relationships within the Family Draconematidae (Nematoda, Desmodorida) Based on Morphological and Molecular Characters. Zool. Sci. 28 (1), 68-84 (2011)
Y16914	Enoplus meridionalis	rRNA small subunit18S	1852	Kampfer,S., Sturmbauer,C. and Ott,J. Phylogenetic analysis of rDNA sequences from adenophorean nematodes and implications for the Adenophorea-Secernentea controversy Invertebr. Biol. 117, 29-36 (1998)
OQ396744	Neochromadora bilineata	rRNA small subunit18S	1680	Sun,J., Chu,M.D. and Huang,Y. Direct Submission Submitted (06-FEB-2023) College of Life Science, Liaocheng University, 1 Hunan Road, Liaocheng, Shandong 252000, China
HM564637	Oncholaimidae sp.	rRNA small subunit18S	1559	Bik,H.M., Thomas,W.K., Lunt,D.H. and Lambshead,P.J. Low endemism, continued deep-shallow interchanges, and evidence for cosmopolitan distributions in free-living marine nematodes (order Enoplida) BMC Evol. Biol. 10 (1), 389 (2010)
OQ396718	Paracanthonchus macrodon	rRNA small subunit18S	1702	Chu,M.D., Sun,J. and Huang,Y. Direct Submission Submitted (06-FEB-2023) College of Life Science, Liaocheng University, 1 Hunan Road, Liaocheng, Shandong 252000, China
HM564435	Pareurystomina sp.	rRNA small subunit18S	1540	Bik,H.M., Lambshead,P.J., Thomas,W.K. and Lunt,D.H.Moving towards a complete molecular framework of the Nematoda: a focus on the Enoplida and early-branching clades BMC Evol. Biol. 10, 353 (2010)
HM564574	Phanodermopsis sp.	rRNA small subunit18S	1643	Bik,H.M., Lambshead,P.J., Thomas,W.K. and Lunt,D.H.Moving towards a complete molecular framework of the Nematoda: a focus on the Enoplida and early-branching clades BMC Evol. Biol. 10, 353 (2010)
OK317214	Promonhystera crinita	rRNA small subunit18S	862	Leduc,D. and Zhao,Z. Common free-living nematodes of Pauatahanui Inlet (Nematoda), the Marine Fauna of New Zealand Unpublished
HM564606	Rhabdocoma sp.	rRNA small subunit18S	1615	Bik,H.M., Lambshead,P.J., Thomas,W.K. and Lunt,D.H.Moving towards a complete molecular framework of the Nematoda: a focus on the Enoplida and early-branching clades BMC Evol. Biol. 10, 353 (2010)
OL388485	Rhabdodemania sp.	rRNA small subunit18S	1701	Ahmed,M. and Holovachov,O. 20 years after De Ley & Blaxter - how far did we progress in understanding the phylogeny of the phylum Nematoda? Unpublished
OL416402	Setostephanolaimus sp.	rRNA small subunit18S	1739	Tchesunov,A.V., Nikolaeva,O.V., Rusin,L.Y., Sanamyan,N.P., Panina,E.G., Miljutin,D.M., Gorelysheva,D.I., Pegova,A.N., Khromova,M.R., Mardashova,M.V., Mikhailov,K.V., Yushin,V.V., Petrov,N.B., Lyubetsky,V.A., Nikitin,M.A. and Aleoshin,V.V. Paraphyly of Marimermithida refines primary routes of transition to parasitism in roundworms Zool J Linn Soc (2022) In press
AY284693	Theristus agilis	rRNA small subunit18S	1354	Helder,J., Van den Elsen,S.J.J., Bongers,A.M.T., Wurff,A.W.G. and Bakker,J. Method for determining soil health ecologically and agriculturally. Patent: PCT (PCT/NL2004/000247)-A 01-APR-2004; The Technology Foundation STW; Utrecht; The Netherlands
HM564619	Thoracostomopsidae sp.	rRNA small subunit18S	1598	Bik,H.M., Thomas,W.K., Lunt,D.H. and Lambshead,P.J. Low endemism, continued deep-shallow interchanges, and evidence for cosmopolitan distributions in free-living marine nematodes (order Enoplida) BMC Evol. Biol. 10 (1), 389 (2010)
HM564585	Trefusia sp.	rRNA small subunit18S	1655	Bik,H.M., Thomas,W.K., Lunt,D.H. and Lambshead,P.J. Low endemism, continued deep-shallow interchanges, and evidence for cosmopolitan distributions in free-living marine nematodes (order Enoplida) BMC Evol. Biol. 10 (1), 389 (2010)
KR492034	Trischistoma pellucidum	rRNA small subunit18S	1627	Xu,Y.M., Zhao,Z.Q. and Wang,J.M. A new species and a new record of Trischistoma Cobb, 1913 (Nematoda: Enoplida: Trischistomatidae) from Shanxi Province, China Zootaxa 3937 (3), 564-576 (2015)
GQ503075	Trischistoma sp.	rRNA small subunit18S	1669	Zhao,Z.Q. A review of the genus Tripylina Brzeski, 1963 (Nematoda:Triplonchida), with descriptions of five new species from New Zealand Zootaxa 2238, 1-24 (2009)
MK626785.	Daptonema sp.	rRNA small subunit18S	758	Tytgat,B., Nguyen,D.T., Nguyen,T.X.P., Vanreusel,A. and Derycke,S. Monitoring of marine nematode communities through 18S rRNA metabarcoding as a sensitive alternative to morphology. Unpublished (2019)
MG669865	Metadesmolaimus aduncus	rRNA small subunit18S	938	Macheriotou,L., Guilini,K., Nara Bezerra,T., Tytgat,B., Tu Nguyen,D., Xuan Phuong Nguyen,T., Noppe,F., Armenteros,M., Boufahja,F., Vanreusel,A. and Derycke,S. Reaching the species level: Metabarcoding free-living marine nematodes using curated 18S and CO1 reference sequence databases. Unpublished (2017)
MG669720	Daptonema oxycerca	rRNA small subunit18S	934	Macheriotou,L., Guilini,K., Nara Bezerra,T., Tytgat,B., Tu Nguyen,D., Xuan Phuong Nguyen,T., Noppe,F., Armenteros,M., Boufahja,F., Vanreusel,A. and Derycke,S. Reaching the species level: Metabarcoding free-living marine nematodes using curated 18S and CO1 reference sequence databases. Unpublished (2017)
KX944151	Paracomesoma sp.	rRNA small subunit18S	856	Avo,A.P., Daniell,T.J., Neilson,R., Oliveira,S., Branco,J. and Adao,H. DNA Barcoding and Morphological Identification of benthic nematodes assemblages of estuarine intertidal sediments: advances in molecular tools for biodiversity assessment. Front Mar Sci (2017) In press
MN250124	Sabatieria sp.	rRNA small subunit18S	1704	Pereira,T.J., De Santiago,A., Schuelke,T., Hardy,S.M. and Bik,H.M. The impact of intragenomic rRNA variation on alphadiversity estimates in metabarcoding studies: a case study from marine nematode (2019)
MG669884	Microlaimus honestus	rRNA small subunit18S	878	Macheriotou,L., Guilini,K., Nara Bezerra,T., Tytgat,B., Tu Nguyen,D., Xuan Phuong Nguyen,T., Noppe,F., Armenteros,M., Boufahja,F., Vanreusel,A. and Derycke,S. Reaching the species level: Metabarcoding free-living marine nematodes using curated 18S and CO1 reference sequence databases. Unpublished (2017)
KX944149	Odontophoroides sp.	rRNA small subunit18S	1482	Avo,A.P., Daniell,T.J., Neilson,R., Oliveira,S., Branco,J. and Adao,H. DNA Barcoding and Morphological Identification of benthic nematodes assemblages of estuarine intertidal sediments: advances in molecular tools for biodiversity assessment. Front Mar Sci (2017) In press
KX944148	Odontophora sp.	rRNA small subunit18S	895	Avo,A.P., Daniell,T.J., Neilson,R., Oliveira,S., Branco,J. and Adao,H. DNA Barcoding and Morphological Identification of benthic nematodes assemblages of estuarine intertidal sediments: advances in molecular tools for biodiversity assessment. Front Mar Sci (2017) In press
MK626797	Metalinhomoeus sp.	rRNA small subunit18S	864	Tytgat,B., Nguyen,D.T., Nguyen,T.X.P., Vanreusel,A. and Derycke,S. Monitoring of marine nematode communities through 18S rRNA metabarcoding as a sensitive alternative to morphology. Unpublished (2019)
OP137155	Acanthopharynx micans	rRNA small subunit18S	861	Tchesunov,A., Garcia,P.R., Simakova,U. and Mokievsky,V. Acanthopharynx Marine Nematodes (Nematoda, Chromadoria, Desmodoridae) Dwelling in Tropical Demosponges: Integrative Taxonomy with Description of a New Species Diversity (Basel) 15 (1), 48 (2023)
MT604123	Zalonema sp.	rRNA small subunit18S	1578	Gharahkhani,A. Direct Submission. Submitted (12-JUN-2020) Plant Pathology, Tarbiat Modares University, Pajohesh BLV, Tehran, Tehran 0098, Iran
OK317205	Chromaspirina stilbonematinops	rRNA small subunit18S	1538	Leduc,D. and Zhao,Z. Common free-living nematodes of Pauatahanui Inlet (Nematoda), the Marine Fauna of New Zealand Unpublished
MW078526	Bradylaimus suecicus	rRNA small subunit18S	1699	Ahmed,M. and Holovachov,O. 20 years after De Ley & Blaxter - how far did we progress in understanding the phylogeny of the phylum Nematoda? Unpublished
KX077910	Desmodora bilacinia	rRNA small subunit18S	1594	Leduc,D. and Zhao,Z. New Acanthopharynx and Desmodora species (Nematoda: Desmodorinae) from intertidal sediments of New Zealand. Unpublished (2016)
KX944156	Prochaetosoma sp.	rRNA small subunit18S	1583	Avo,A.P., Daniell,T.J., Neilson,R., Oliveira,S., Branco,J. and Adao,H. DNA Barcoding and Morphological Identification of benthic nematodes assemblages of estuarine intertidal sediments: advances in molecular tools for biodiversity assessment. Front Mar Sci (2017) In press
MG669973	Perepsilonema corsicum	rRNA small subunit18S	886	Macheriotou,L., Guilini,K., Nara Bezerra,T., Tytgat,B., Tu Nguyen,D., Xuan Phuong Nguyen,T., Noppe,F., Armenteros,M., Boufahja,F., Vanreusel,A. and Derycke,S. Reaching the species level: Metabarcoding free-living marine nematodes using curated 18S and CO1 reference sequence databases. Unpublished (2017)
MF997605	Laxus sakihariiae	rRNA small subunit18S	1584	Leduc,D. and Sinniger,F. Combining morphological and molecular data to classify Laxus sakihariiae sp. n., a new stilbonematine nematode (Nematoda: Desmodoridae) from the coast of Sesoko Island, Japan. Nematology 20 (1), 81-95 (2018)
LR746211	Catanema sp.	rRNA small subunit18S	1796	Scharhauser,F., Zimmermann,J., Ott,J.A., Leisch,N. and Gruber-Vodicka,H. Direct Submission. Submitted (18-DEC-2019) Max Planck Institute for Marine Microbiology, Celsiusstrasse 1, 28359 Bremen, Germany
MG669944	Paracyatholaimus oistospiculoides	rRNA small subunit18S	875	Macheriotou,L., Guilini,K., Nara Bezerra,T., Tytgat,B., Tu Nguyen,D., Xuan Phuong Nguyen,T., Noppe,F., Armenteros,M., Boufahja,F., Vanreusel,A. and Derycke,S. Reaching the species level: Metabarcoding free-living marine nematodes using curated 18S and CO1 reference sequence databases. Unpublished (2017)
MN786724	Demonema rapax	rRNA small subunit18S	1656	Ahmed,M., Bostrom,S. and Holovachov,O. Revision of the genus Cobbionema Filipjev, 1922 (Nematoda, Chromadorida, Selachinematidae). Unpublished (2020)
KX944130	Bathylaimus sp.	rRNA small subunit18S	920	Avo,A.P., Daniell,T.J., Neilson,R., Oliveira,S., Branco,J. and Adao,H. DNA Barcoding and Morphological Identification of benthic nematodes assemblages of estuarine intertidal sediments: advances in molecular tools for biodiversity assessment. Front Mar Sci (2017) In press
MK722523	Tripylina sp.	rRNA small subunit18S	1668	Renco,M., Rybarczyk-Mydlowska,K., Flis,L., Kubicz,M. and Winiszewska,G. A new species of the genus Tripylina Brzeski, 1963 (Nematoda: Enoplida) from natural beech forest, Slovakia. Unpublished (2019)
KR265042	Meyersia sp.	rRNA small subunit18S	1615	Smythe,A.B. Evolution of Feeding Structures in the Marine Nematode Order Enoplida. Integr. Comp. Biol. (2015) In press
KX944167	Viscosia elegans	rRNA small subunit18S	931	Ahmed,M., Bostrom,S. and Holovachov,O. Revision of the genus Cobbionema Filipjev, 1922 (Nematoda, Chromadorida, Selachinematidae). Unpublished (2020)
KR265050	Symplocostoma sp.	rRNA small subunit18S	1613	Smythe,A.B. Direct Submission. Submitted (24-APR-2015) Biology, Virginia Military Institute, 301B Maury-Brooke Hall, Lexington, VA, USA
KX944136	Eurystomina sp.	rRNA small subunit18S	1325	Avo,A.P., Daniell,T.J., Neilson,R., Oliveira,S., Branco,J. and Adao,H. DNA Barcoding and Morphological Identification of benthic nematodes assemblages of estuarine intertidal sediments: advances in molecular tools for biodiversity assessment. Front Mar Sci (2017) In press
KY497017	Oncholaimus sp.	rRNA small subunit18S	828	Salma,J., Saima,M. and Shahina,F. Direct Submission (23-JAN-2017) National Nematological Research Centre, Nnrc, University of Karachi, Karachi-75270, Pakistan, Karachi, Sindh 75270, Pakistan
MG669910	Oncholaimus sp.	rRNA small subunit18S	875	Macheriotou,L., Guilini,K., Nara Bezerra,T., Tytgat,B., Tu Nguyen,D., Xuan Phuong Nguyen,T., Noppe,F., Armenteros,M., Boufahja,F., Vanreusel,A. and Derycke,S. Reaching the species level: Metabarcoding free-living marine nematodes using curated 18S and CO1 reference sequence databases. Unpublished (2017)
HQ668023	Echinomermella matsi	rRNA small subunit18S	787	Poinar,G.O. Jr., Lewis,S.C., Hagen,N.T. and Hyman,B.C. Systematic affinity of the sea urchin parasite, Echinomermella matsi Jones and Hagen (Enoplida: Echinomermellida; Echinomermellidae) Nematology (2011) In press
MG599081	Mesacanthoides sp.	rRNA small subunit18S	1646	Shi,B., Pu,S. and Xu,K. Molecular phylogenetic relationships within the family Thoracostomopsidae (Nematoda: Enoplida), with descriptions of three new species from the East China Sea. Unpublished (2019)
HM564486	Phanodermatidae sp.	rRNA small subunit18S	1642	ik,H.M., Lambshead,P.J., Thomas,W.K. and Lunt,D.H. Moving towards a complete molecular framework of the Nematoda: a focus on the Enoplida and early-branching clades. BMC Evol. Biol. 10, 353 (2010)
MG599068	Epacanthion sparsisetae	rRNA small subunit18S	1655	Shi,B., Pu,S. and Xu,K. Molecular phylogenetic relationships within the family Thoracostomopsidae (Nematoda: Enoplida), with descriptions of three new species from the East China Sea. Unpublished (2019)
MG599065	Epacanthion hirsutum	rRNA small subunit18S	1671	Shi,B., Pu,S. and Xu,K. Molecular phylogenetic relationships within the family Thoracostomopsidae (Nematoda: Enoplida), with descriptions of three new species from the East China Sea. Unpublished (2019)
LK054715	Calyptronema sp.	rRNA small subunit18S	818	Armenteros,M., Rojas-Corzo,A., Ruiz-Abierno,A., Derycke,S., Backeljau,T. and Decraemer,W. Systematics and DNA barcoding of free-living marine nematodes with emphasis on tropical desmodorids using nuclear SSU rDNA and mitochondrial COI sequences. Unpublished (2014)
MW258650	Paramesacanthion sp.	rRNA small subunit18S	1464	Mordukhovich,V.V., Semenchenko,A.A., Zograf,J.K., Mikhailova,E.R. and Fadeeva,N.P. Revision of the genus Paramesacanthion (Thoracostomopsidae, Nematoda) with description of new species. Unpublished (2020)
AY926778	Gammarus aequicaudus	rRNA small subunit18S	749	MacDonald,K.S. III, Yampolsky,L. and Duffy,J.E. Molecular and morphological evolution of the amphipod radiation of Lake Baikal Mol. Phylogenet. Evol. 35 (2), 323-343 (2005)
EU867770	Zschokkella mugilis	rRNA small subunit18S	853	Rangel,L.F., Santos,M.J., Cech,G. and Szekely,C. Morphology, molecular data and development of Zschokkella Mugilis (Myxosporea, Bivalvulida) in a polychaete alternate host, nereis diversicolor J. Parasitol., 1 (2008) In press

## Sheet: 28S
Accension number	Species	Marker	Length (bp)	Reference
DQ077755	Chromadorida sp.	rRNA small subunit28S	701	De Ley,P., De Ley,I.T., Morris,K., Abebe,E., Mundo-Ocampo,M., Yoder,M., Heras,J., Waumann,D., Rocha-Olivares,A., Jay Burr,A.H., Baldwin,J.G. and Thomas,W.K. An integrated approach to fast and informative morphological vouchering of nematodes for applications in molecular barcoding Philos. Trans. R. Soc. Lond., B, Biol. Sci. 360 (1462), 1945-1958 (2005)
DQ077759	Enoploides sp.	rRNA small subunit28S	561	De Ley,P., De Ley,I.T., Morris,K., Abebe,E., Mundo-Ocampo,M., Yoder,M., Heras,J., Waumann,D., Rocha-Olivares,A., Jay Burr,A.H., Baldwin,J.G. and Thomas,W.K. An integrated approach to fast and informative morphological vouchering of nematodes for applications in molecular barcoding Philos. Trans. R. Soc. Lond., B, Biol. Sci. 360 (1462), 1945-1958 (2005)
GU139785	Pareurystomina sp.	rRNA small subunit28S	683	Pereira,T.J., Fonseca,G.C., Mundo-Ocampo,M. and Rocha-Olivares,A. Diversity of free-living marine nematodes assessed by integrative taxonomy: implications for DNA barcoding Unpublished
HM564676	Bathylaimus sp.	rRNA small subunit28S	695	Bik,H.M., Lambshead,P.J., Thomas,W.K. and Lunt,D.H.Moving towards a complete molecular framework of the Nematoda: a focus on the Enoplida and early-branching clades BMC Evol. Biol. 10, 353 (2010)
HM564829	Anticomidae sp.	rRNA small subunit28S	638	Bik,H.M., Lambshead,P.J., Thomas,W.K. and Lunt,D.H.Moving towards a complete molecular framework of the Nematoda: a focus on the Enoplida and early-branching clades BMC Evol. Biol. 10, 353 (2010)
JX512279	Sabatieria praedatrix	rRNA small subunit28S	735	Tu,N.D., Thanh,N.V., Hien,N.T. and Long,P.K. Direct Submission Submitted (19-AUG-2012) Nematology, Institute of Ecology and Biological Resources, 18 Hoang Quoc Viet, Cau Giay, Ha Noi 10000, Vietnam
KC755212	Daptonema sp.	rRNA small subunit28S	721	Vogt,P., Miljutina,M. and Raupach,M.J. The use of DNA sequence data for the identification of benthic nematodes from the North Sea Helgol Mar Res 68, 549-558 (2014)
KX352222	Paracanthonchus gynodiporata	rRNA small subunit28S	747	de Oliveira,D.A.S. A marine epiphytic nematode (Cyatholaimidae) revels low genetic but high morphological variation over more than 1000 km Unpublished
OK317230	Linhomoeus manaensis	rRNA small subunit28S	693	Leduc,D. and Zhao,Z. Common free-living nematodes of Pauatahanui Inlet (Nematoda), the Marine Fauna of New Zealand Unpublished
OK317234	Paramonohystera leptamphida	rRNA small subunit28S	708	Leduc,D. and Zhao,Z. Common free-living nematodes of Pauatahanui Inlet (Nematoda), the Marine Fauna of New Zealand Unpublished
OP137146	Acanthopharynx micans	rRNA small subunit28S	673	Tchesunov,A., Garcia,P.R., Simakova,U. and Mokievsky,V. Acanthopharynx Marine Nematodes (Nematoda, Chromadoria, Desmodoridae) Dwelling in Tropical Demosponges: Integrative Taxonomy with Description of a New Species Diversity (Basel) 15 (1), 48 (2023)
OQ031165	Oncholaimellus sp.	rRNA small subunit28S	659	Zhou,R. and Guo,Y.Direct Submission Submitted (11-DEC-2022) Fisheries College, Jimei University,
OQ417522	Phanoderma ocellatum	rRNA small subunit28S	774	Sun,J., Chu,M.D., Huang,Y. and Geng,C.X. Direct Submission Submitted (07-FEB-2023) College of Life Science, Liaocheng University, 1 Hunan Road, Liaocheng, Shandong 252000, China
OR589667	Desmodora communis	rRNA small subunit28S	762	Ahmed,M., Nascimento,F. and Holovachov,O. Direct Submission. Submitted (21-SEP-2023) Zoology, Swedish Museum of Natural History, Freskativagen 40, Stockholm 11418, Sweden
OR589677	Chromaspirina pellita	rRNA small subunit28S	745	Ahmed,M., Nascimento,F. and Holovachov,O. Direct Submission. Submitted (21-SEP-2023) Zoology, Swedish Museum of Natural History, Freskativagen 40, Stockholm 11418, Sweden
OR589742	Rhabdodemania sp.	rRNA small subunit28S	773	Ahmed,M., Nascimento,F. and Holovachov,O. Direct Submission. Submitted (21-SEP-2023) Zoology, Swedish Museum of Natural History, Freskativagen 40, Stockholm 11418, Sweden
AB778502	Paramoera shakotanensis	rRNA small subunit28S	787	Tomikawa,K., Kobayashi,N., Kyono,M., Ishimaru,S. and Grygier,M.J. Description of a new species of Sternomoera (Crustacea: Amphipoda: Pontogeneiidae) from Japan, with an analysis of the phylogenetic relationships among the Japanese species based on the 28S rRNA gene Zool. Sci. 31, 475-490 (2014) DOI:10.2108/zs140026
MT763457	Eumida schanderi	rRNA small subunit28S	791	Teixeira,M.A.L., Vieira,P.E., Ravara,A., Costa,F.O. and Nygren,A. From 13 to 22 in a second stroke: revisiting the European Eumida sanguinea (Phyllodocidae: Annelida) species complex. Zool J Linn Soc (2022) In press
