# Supplementary material for: The tip of the iceberg: extraordinarily high diversity while examining two infralittoral nematode communities on Okinawa-jima Island, Japan, using morphology and DNA barcoding
Source: PeerJ. 2025 Jul 30;13:e19757. doi: 10.7717/peerj.19757 (PMC12317692; doi:10.7717/peerj.19757)
Supplement: Supplemental Information 2 [file peerj-13-19757-s002.xlsx]

## Sheet: This research
Sample code	Taxon	Accension number	Marker	Primer	Date	Country	Location	Microhabitat	Zonation	Haplotype	Sequences with same haplotype
KBC1.6	Desmodora	PP859917	18S	Nem18SF/Nem18SR	2022-10-08	Japan	Kouri	Coral	Infralittoral	Hap_17	-
KBC1.7	Paracanthonchus	PP859918	18S	Nem18SF/Nem18SR	2022-10-08	Japan	Kouri	Coral	Infralittoral	Hap_19	-
KBC1.8	Phanodermatidae	PP859919	18S	Nem18SF/Nem18SR	2022-10-08	Japan	Kouri	Coral	Infralittoral	Hap_20	-
KBC2.1	Chromadorella	PP859920	18S	Nem18SF/Nem18SR	2022-10-08	Japan	Kouri	Coral	Infralittoral	Hap_21	-
KBC2.10	Fotolaimus	PP859921	18S	Nem18SF/Nem18SR	2022-10-08	Japan	Kouri	Coral	Infralittoral	Hap_22	-
KBC2.3	Oncholaimidae	PP859922	18S	Nem18SF/Nem18SR	2022-10-08	Japan	Kouri	Coral	Infralittoral	Hap_23	NBC2.19, NBC3.14, NBF1.42
KBC2.4	Paracanthonchus	PP859923	18S	Nem18SF/Nem18SR	2022-10-08	Japan	Kouri	Coral	Infralittoral	Hap_24	-
KBC2.5	Cyatholaimus	PP859924	18S	Nem18SF/Nem18SR	2022-10-08	Japan	Kouri	Coral	Infralittoral	Hap_25	-
KBC2.8	Thoracostomopsidae	PP859925	18S	Nem18SF/Nem18SR	2022-10-08	Japan	Kouri	Coral	Infralittoral	Hap_26	-
KBC3.4	Desmodoridae	PP859926	18S	Nem18SF/Nem18SR	2022-10-08	Japan	Kouri	Coral	Infralittoral	Hap_27	-
KBC3.7	Epacanthion	PP859927	18S	Nem18SF/Nem18SR	2022-10-08	Japan	Kouri	Coral	Infralittoral	Hap_28	-
KBF1.19	Aponema	PP859928	18S	Nem18SF/Nem18SR	2022-10-15	Japan	Kouri	Seagrass	Infralittoral	Hap_29	-
KBF2.10	Paracanthonchus	PP859929	18S	Nem18SF/Nem18SR	2022-10-15	Japan	Kouri	Seagrass	Infralittoral	Hap_30	KBS2.10, KBS2.7, KBS3.12, NBC2.12, NBF1.26, NBF1.27, NBF1.33, NBF3.5, NBS1.18
KBF2.11	Linhomoeidae	PP859930	18S	Nem18SF/Nem18SR	2022-10-15	Japan	Kouri	Seagrass	Infralittoral	Hap_31	-
KBF2.3	Mesacanthoides	PP859931	18S	Nem18SF/Nem18SR	2022-10-15	Japan	Kouri	Seagrass	Infralittoral	Hap_33	-
KBF2.4	Oncholaimidae	PP859932	18S	Nem18SF/Nem18SR	2022-10-15	Japan	Kouri	Seagrass	Infralittoral	Hap_34	-
KBF2.8	Oncholaimidae	PP859933	18S	Nem18SF/Nem18SR	2022-10-15	Japan	Kouri	Seagrass	Infralittoral	Hap_35	KBS4.3
KBF3.15	Desmodoridae	PP859934	18S	Nem18SF/Nem18SR	2022-10-15	Japan	Kouri	Seagrass	Infralittoral	Hap_36	-
KBF3.17	Epachantion	PP859935	18S	Nem18SF/Nem18SR	2022-10-15	Japan	Kouri	Seagrass	Infralittoral	Hap_37	-
KBF3.3	Pareurystomina	PP859936	18S	Nem18SF/Nem18SR	2022-10-15	Japan	Kouri	Seagrass	Infralittoral	Hap_38	-
KBS1.1	Comesomatidae	PP859937	18S	Nem18SF/Nem18SR	2022-10-15	Japan	Kouri	Sand	Infralittoral	Hap_39	-
KBS1.10	Microlamidae	PP859938	18S	Nem18SF/Nem18SR	2022-10-15	Japan	Kouri	Sand	Infralittoral	Hap_40	KBS1.11, KBS1.24, KBS1.7
KBS1.14	Microlaimus	PP859939	18S	Nem18SF/Nem18SR	2022-10-15	Japan	Kouri	Sand	Infralittoral	Hap_41	KBS1.16
KBS1.15	Catanema	PP859940	18S	Nem18SF/Nem18SR	2022-10-15	Japan	Kouri	Sand	Infralittoral	Hap_42	-
KBS1.17	Vasostoma	PP859941	18S	Nem18SF/Nem18SR	2022-10-15	Japan	Kouri	Sand	Infralittoral	Hap_43	KBS1.8, NBS2.17
KBS1.2	Rhabdocoma	PP859942	18S	Nem18SF/Nem18SR	2022-10-15	Japan	Kouri	Sand	Infralittoral	Hap_44	-
KBS1.21	Monhysterina	PP859943	18S	Nem18SF/Nem18SR	2022-10-15	Japan	Kouri	Sand	Infralittoral	Hap_45	-
KBS1.3	Meyersia	PP859944	18S	Nem18SF/Nem18SR	2022-10-15	Japan	Kouri	Sand	Infralittoral	Hap_46	KBS2.1, KBS2.14, KBS2.3, KBS2.6, KBS3.16, KBS3.18, KBS3.21, KBS3.22, KBS4.1, KBS4.11, KBS4.12, KBS4.9, NBC1.2, NBC2.26, NBF1.18, NBF1.32, NBF2.1, NBF2.14, NBF2.6, NBF2.8, NBF2.9, NBF3.16, NBF3.2, NBF3.20, NBF3.8, NBS1.11, NBS1.17, NBS1.19, NBS2.16, NBS2.23, NBS3.3, NBS3.5
KBS1.6	Steineria	PP859945	18S	Nem18SF/Nem18SR	2022-10-15	Japan	Kouri	Sand	Infralittoral	Hap_47	-
KBS2.11	Neochromadora	PP859946	18S	Nem18SF/Nem18SR	2022-10-15	Japan	Kouri	Sand	Infralittoral	Hap_48	-
KBS2.12	Xyalidae	PP859947	18S	Nem18SF/Nem18SR	2022-10-15	Japan	Kouri	Sand	Infralittoral	Hap_49	-
KBS2.15	Parapinnanema	PP859948	18S	Nem18SF/Nem18SR	2022-10-15	Japan	Kouri	Sand	Infralittoral	Hap_51	-
KBS2.17	Parapinnanema	PP859949	18S	Nem18SF/Nem18SR	2022-10-15	Japan	Kouri	Sand	Infralittoral	Hap_51	-
KBS2.18	Viscosia	PP859950	18S	Nem18SF/Nem18SR	2022-10-15	Japan	Kouri	Sand	Infralittoral	Hap_52	-
KBS2.19	Filoncholaimus sp.	PP860023	18S	Nem18SF/Nem18SR	2022-10-15	Japan	Kouri	Sand	Infralittoral	-	-
KBS2.8	Meyersia	PP860021	18S	Nem18SF/Nem18SR	2022-10-15	Japan	Kouri	Sand	Infralittoral	Hap_134	-
KBS2.9	Laxus	PP860022	18S	Nem18SF/Nem18SR	2022-10-15	Japan	Kouri	Sand	Infralittoral	-	-
KBS3.11	Cheironchus	PP859951	18S	Nem18SF/Nem18SR	2022-10-15	Japan	Kouri	Sand	Infralittoral	Hap_54	-
KBS3.13	Phanodermatidae	PP859952	18S	Nem18SF/Nem18SR	2022-10-15	Japan	Kouri	Sand	Infralittoral	Hap_55	-
KBS3.15	Desmodora	PP859953	18S	Nem18SF/Nem18SR	2022-10-15	Japan	Kouri	Sand	Infralittoral	Hap_56	KBS3.15, KBS3.17, NBC2.24, NBC2.5, NBC2.7, NBF1.16, NBF1.29, NBF1.38, NBF1.39, NBF1.40, NBF2.11, NBF2.12, NBF3.1, NBF3.10, NBF3.15, NBF3.21, NBF3.3, NBF3.6, NBS1.14, NBS1.8, NBS2.12, NBS2.14, NBS2.20, NBS2.3, NBS2.7, NBS3.24
KBS3.20	Theristus	PP859954	18S	Nem18SF/Nem18SR	2022-10-15	Japan	Kouri	Sand	Infralittoral	Hap_50	-
KBS3.23	Xyalidae	PP859955	18S	Nem18SF/Nem18SR	2022-10-15	Japan	Kouri	Sand	Infralittoral	Hap_57	NBF1.17, NBS2.13, NBS2.22, NBS3.4
KBS3.5	Acanthopharynx	PP859956	18S	Nem18SF/Nem18SR	2022-10-15	Japan	Kouri	Sand	Infralittoral	Hap_58	-
KBS3.6	Laxus	PP859957	18S	Nem18SF/Nem18SR	2022-10-15	Japan	Kouri	Sand	Infralittoral	Hap_59	-
KBS3.9	Enoploides	PP859958	18S	Nem18SF/Nem18SR	2022-10-15	Japan	Kouri	Sand	Infralittoral	Hap_60	-
KBS4.14	Paracanthonchus	PP859959	18S	Nem18SF/Nem18SR	2022-10-15	Japan	Kouri	Sand	Infralittoral	Hap_61	-
KBS4.2	Meyersia	PP859960	18S	Nem18SF/Nem18SR	2022-10-15	Japan	Kouri	Sand	Infralittoral	Hap_62	-
NBC1.11	Cobbia	PP859961	18S	Nem18SF/Nem18SR	2022-10-22	Japan	Senaha	Coral	Infralittoral	Hap_63	-
NBC1.12	Desmodoridae	PP859962	18S	Nem18SF/Nem18SR	2022-10-22	Japan	Senaha	Coral	Infralittoral	Hap_64	-
NBC1.17	Enoploides	PP859963	18S	Nem18SF/Nem18SR	2022-10-22	Japan	Senaha	Coral	Infralittoral	Hap_65	-
NBC1.18	Cyatholaimidae	PP859964	18S	Nem18SF/Nem18SR	2022-10-22	Japan	Senaha	Coral	Infralittoral	Hap_66	-
NBC1.19	Epacanthion	PP859965	18S	Nem18SF/Nem18SR	2022-10-22	Japan	Senaha	Coral	Infralittoral	Hap_67	-
NBC1.21	Daptonema	PP859966	18S	Nem18SF/Nem18SR	2022-10-22	Japan	Senaha	Coral	Infralittoral	Hap_68	NBC1.8
NBC1.23	Cyatholaimus	PP859967	18S	Nem18SF/Nem18SR	2022-10-22	Japan	Senaha	Coral	Infralittoral	Hap_69	-
NBC1.27	Axonolaimus	PP859968	18S	Nem18SF/Nem18SR	2022-10-22	Japan	Senaha	Coral	Infralittoral	-	-
NBC1.28	Nannolaimoides	PP859969	18S	Nem18SF/Nem18SR	2022-10-22	Japan	Senaha	Coral	Infralittoral	Hap_70	-
NBC1.4	Laxus	PP859970	18S	Nem18SF/Nem18SR	2022-10-22	Japan	Senaha	Coral	Infralittoral	Hap_71	-
NBC1.5	Anticoma	PP859971	18S	Nem18SF/Nem18SR	2022-10-22	Japan	Senaha	Coral	Infralittoral	Hap_72	-
NBC2.1	Zalonema	PP859972	18S	Nem18SF/Nem18SR	2022-10-22	Japan	Senaha	Coral	Infralittoral	Hap_73	NBC3D.1, NBF1.13, NBF2.21, NBF3.7, NBS2.21
NBC2.14	Epacanthion	PP859973	18S	Nem18SF/Nem18SR	2022-10-22	Japan	Senaha	Coral	Infralittoral	Hap_75	-
NBC2.16	Anticoma	PP859974	18S	Nem18SF/Nem18SR	2022-10-22	Japan	Senaha	Coral	Infralittoral	Hap_76	-
NBC2.17	Axonolaimus	PP859975	18S	Nem18SF/Nem18SR	2022-10-22	Japan	Senaha	Coral	Infralittoral	-	-
NBC2.18	Viscosia	PP859976	18S	Nem18SF/Nem18SR	2022-10-22	Japan	Senaha	Coral	Infralittoral	Hap_77	-
NBC2.21	Selachinematidae	PP859977	18S	Nem18SF/Nem18SR	2022-10-22	Japan	Senaha	Coral	Infralittoral	Hap_78	-
NBC2.22	Enchelidiidae	PP859978	18S	Nem18SF/Nem18SR	2022-10-22	Japan	Senaha	Coral	Infralittoral	Hap_79	-
NBC2.23	Selachinematidae	PP859979	18S	Nem18SF/Nem18SR	2022-10-22	Japan	Senaha	Coral	Infralittoral	Hap_80	-
NBC2.25	Meyersia	PP859980	18S	Nem18SF/Nem18SR	2022-10-22	Japan	Senaha	Coral	Infralittoral	Hap_81	-
NBC2.28	Trischistoma	PP859981	18S	Nem18SF/Nem18SR	2022-10-22	Japan	Senaha	Coral	Infralittoral	Hap_82	-
NBC2.3	Axonolaimidae	PP859982	18S	Nem18SF/Nem18SR	2022-10-22	Japan	Senaha	Coral	Infralittoral	Hap_83	-
NBC2.31	Acanthopharynx	PP859983	18S	Nem18SF/Nem18SR	2022-10-22	Japan	Senaha	Coral	Infralittoral	Hap_84	-
NBC2.32	Desmodoridae	PP859984	18S	Nem18SF/Nem18SR	2022-10-22	Japan	Senaha	Coral	Infralittoral	Hap_85	NBS1.9
NBC2.4	Acanthopharynx	PP859985	18S	Nem18SF/Nem18SR	2022-10-22	Japan	Senaha	Coral	Infralittoral	Hap_86	-
NBC2.6	Oncholaimidae	PP859987	18S	Nem18SF/Nem18SR	2022-10-22	Japan	Senaha	Coral	Infralittoral	Hap_91	-
NBC2.8	Acanthopharynx	PP859986	18S	Nem18SF/Nem18SR	2022-10-22	Japan	Senaha	Coral	Infralittoral	Hap_90	-
NBC2.9	Cyatholaimus	PP859988	18S	Nem18SF/Nem18SR	2022-10-22	Japan	Senaha	Coral	Infralittoral	Hap_92	-
NBC3C.1	Anonchus	PP859916	18S	Nem18SF/Nem18SR	2022-10-22	Japan	Senaha	Coral	Infralittoral	Hap_7	-
NBC3D.12	Chromadoridae	PP859989	18S	Nem18SF/Nem18SR	2022-10-22	Japan	Senaha	Coral	Infralittoral	Hap_18	-
NBF1.12	Desmodoridae	PP859990	18S	Nem18SF/Nem18SR	2022-10-21	Japan	Senaha	Seagrass	Infralittoral	Hap_93	-
NBF1.19	Meyersia	PP859991	18S	Nem18SF/Nem18SR	2022-10-21	Japan	Senaha	Seagrass	Infralittoral	Hap_96	-
NBF1.20	Thoracostomopsidae	PP859992	18S	Nem18SF/Nem18SR	2022-10-21	Japan	Senaha	Seagrass	Infralittoral	Hap_97	-
NBF1.24	Epacanthion	PP859993	18S	Nem18SF/Nem18SR	2022-10-21	Japan	Senaha	Seagrass	Infralittoral	Hap_98	NBF3.18
NBF1.28	Eurystomina	PP859994	18S	Nem18SF/Nem18SR	2022-10-21	Japan	Senaha	Seagrass	Infralittoral	Hap_99	-
NBF1.30	Epacanthion	PP859995	18S	Nem18SF/Nem18SR	2022-10-21	Japan	Senaha	Seagrass	Infralittoral	Hap_100	-
NBF1.31	Enchelidiidae	PP859996	18S	Nem18SF/Nem18SR	2022-10-21	Japan	Senaha	Seagrass	Infralittoral	Hap_101	-
NBF1.35	Spirinia sp.	PP859997	18S	Nem18SF/Nem18SR	2022-10-21	Japan	Senaha	Seagrass	Infralittoral	Hap_102	-
NBF1.47	Enoloidea	PP859998	18S	Nem18SF/Nem18SR	2022-10-21	Japan	Senaha	Seagrass	Infralittoral	Hap_74	NBC2.10, NBF1.10, NBF1.34, NBF1.37, NBF1.44, NBF1.45, NBF1.46
NBF2.13	Paracanthonchus	PP859999	18S	Nem18SF/Nem18SR	2022-10-21	Japan	Senaha	Seagrass	Infralittoral	Hap_103	-
NBF2.15	Selachinematidae	PP860000	18S	Nem18SF/Nem18SR	2022-10-21	Japan	Senaha	Seagrass	Infralittoral	Hap_104	-
NBF2.17	Paracanthonchus	PP860001	18S	Nem18SF/Nem18SR	2022-10-21	Japan	Senaha	Seagrass	Infralittoral	Hap_105	NBF2.5
NBF2.19	Paracanthonchus	PP860002	18S	Nem18SF/Nem18SR	2022-10-21	Japan	Senaha	Seagrass	Infralittoral	Hap_106	-
NBF2.2	Phanodermatidae	PP860003	18S	Nem18SF/Nem18SR	2022-10-21	Japan	Senaha	Seagrass	Infralittoral	Hap_107	NBS1.21, NBS2.4
NBF2.22	Desmolaimus	PP860004	18S	Nem18SF/Nem18SR	2022-10-21	Japan	Senaha	Seagrass	Infralittoral	Hap_108	-
NBF2.24	Selachinematidae	PP860005	18S	Nem18SF/Nem18SR	2022-10-21	Japan	Senaha	Seagrass	Infralittoral	Hap_109	NBS3.13
NBF2.3	Viscosia	PP860006	18S	Nem18SF/Nem18SR	2022-10-21	Japan	Senaha	Seagrass	Infralittoral	Hap_110	-
NBF3.13	Paracanthonchus	PP860007	18S	Nem18SF/Nem18SR	2022-10-21	Japan	Senaha	Seagrass	Infralittoral	Hap_111	-
NBF3.14	Chromadorella	PP860008	18S	Nem18SF/Nem18SR	2022-10-21	Japan	Senaha	Seagrass	Infralittoral	-	-
NBF3.17	Zalonema	PP860009	18S	Nem18SF/Nem18SR	2022-10-21	Japan	Senaha	Seagrass	Infralittoral	Hap_112	-
NBF3.9	Cephalanticoma	PP860010	18S	Nem18SF/Nem18SR	2022-10-21	Japan	Senaha	Seagrass	Infralittoral	Hap_18	KBC1.5
NBS1.16	Catanema	PP860011	18S	Nem18SF/Nem18SR	2022-10-21	Japan	Senaha	Sand	Infralittoral	Hap_113	NBS2.19
NBS1.20	Neochromadora	PP860012	18S	Nem18SF/Nem18SR	2022-10-21	Japan	Senaha	Sand	Infralittoral	Hap_53	NBS3.15
NBS1.4	Xyalidae	PP860013	18S	Nem18SF/Nem18SR	2022-10-21	Japan	Senaha	Sand	Infralittoral	Hap_114	-
NBS1.6	Paracanthonchus	PP860014	18S	Nem18SF/Nem18SR	2022-10-21	Japan	Senaha	Sand	Infralittoral	Hap_115	-
NBS2.5	Rhabdodemania	PP860015	18S	Nem18SF/Nem18SR	2022-10-21	Japan	Senaha	Sand	Infralittoral	Hap_116	-
NBS2.8	Microlaimus	PP860016	18S	Nem18SF/Nem18SR	2022-10-21	Japan	Senaha	Sand	Infralittoral	Hap_117	-
NBS2.9	Microlaimidae	PP860017	18S	Nem18SF/Nem18SR	2022-10-21	Japan	Senaha	Sand	Infralittoral	Hap_118	-
NBS3.1	Meyersia	PP860018	18S	Nem18SF/Nem18SR	2022-10-21	Japan	Senaha	Sand	Infralittoral	Hap_119	-
NBS3.6	Laxus	PP860019	18S	Nem18SF/Nem18SR	2022-10-21	Japan	Senaha	Sand	Infralittoral	Hap_120	-
NBS3.9	Enoplus	PP860020	18S	Nem18SF/Nem18SR	2022-10-21	Japan	Senaha	Sand	Infralittoral	Hap_121	-
NBC1.11	Cobbia	PP859885	28S	D2A/D3B	2022-10-22	Japan	Senaha	Coral	Infralittoral	Hap_4	-
NBC1.12	Desmodoridae	PP859886	28S	D2A/D3B	2022-10-22	Japan	Senaha	Coral	Infralittoral	Hap_5	-
NBC1.17	Epacanthion	PP859887	28S	D2A/D3B	2022-10-22	Japan	Senaha	Coral	Infralittoral	Hap_7	-
NBC1.19	Epacanthion	PP859888	28S	D2A/D3B	2022-10-22	Japan	Senaha	Coral	Infralittoral	Hap_8	-
NBC1.2	Daptonema	PP859889	28S	D2A/D3B	2022-10-22	Japan	Senaha	Coral	Infralittoral	Hap_10	-
NBF2.14	Meyersia	PP859898	28S	D2A/D3B	2022-10-22	Japan	Senaha	Coral	Infralittoral	Hap_12	NBF2.1, NBC1.3, NBF2.6, NBF3.12, NBF3.3, NBF3.6, NBF3.8, NBS1.17, NBS1.19, NBS1.21, NBS3.1, NBS3.15, NBS3.3
NBC1.21	Anonchus	PP859890	28S	D2A/D3B	2022-10-22	Japan	Senaha	Coral	Infralittoral	Hap_15	-
NBC1.6	Daptonema	PP859891	28S	D2A/D3B	2022-10-22	Japan	Senaha	Coral	Infralittoral	Hap_16	-
NBC1.9	Desmodoridae	PP859892	28S	D2A/D3B	2022-10-22	Japan	Senaha	Coral	Infralittoral	Hap_19	-
NBC2.5	Desmodora	PP859893	28S	D2A/D3B	2022-10-22	Japan	Senaha	Coral	Infralittoral	Hap_21	NBF1.26, NBF1.3, NBF3.1, NBF3.10, NBF3.19, NBF3.21, NBS1.15, NBS1.8, NBS2.14, NBS2.3
NBF1.28	Eurystomina	PP859894	28S	D2A/D3B	2022-10-21	Japan	Senaha	Seagrass	Infralittoral	Hap_26	-
NBF1.30	Epacanthion	PP859895	28S	D2A/D3B	2022-10-21	Japan	Senaha	Seagrass	Infralittoral	Hap_30	-
NBF1.34	Phanodermatidae	PP859896	28S	D2A/D3B	2022-10-21	Japan	Senaha	Seagrass	Infralittoral	Hap_31	-
NBF1.5	Anticoma	PP859897	28S	D2A/D3B	2022-10-21	Japan	Senaha	Seagrass	Infralittoral	Hap_32	-
NBF2.10	Phanodermatidae	PP859899	28S	D2A/D3B	2022-10-21	Japan	Senaha	Seagrass	Infralittoral	Hap_33	NBF3.4, NBS1.23, NBS1.4
NBF2.13	Paracanthonchus	PP859900	28S	D2A/D3B	2022-10-21	Japan	Senaha	Seagrass	Infralittoral	Hap_34	NBF2.17
NBF2.15	Demonema	PP859901	28S	D2A/D3B	2022-10-21	Japan	Senaha	Seagrass	Infralittoral	Hap_35	-
NBF2.21	Zalonema	PP859902	28S	D2A/D3B	2022-10-21	Japan	Senaha	Seagrass	Infralittoral	Hap_36	NBF3.7
NBF2.22	Desmolaimus	PP859903	28S	D2A/D3B	2022-10-21	Japan	Senaha	Seagrass	Infralittoral	Hap_37	-
NBF2.3	Viscosia	PP859904	28S	D2A/D3B	2022-10-21	Japan	Senaha	Seagrass	Infralittoral	Hap_38	-
NBF3.9	Cephalanticoma	PP859907	28S	D2A/D3B	2022-10-21	Japan	Senaha	Seagrass	Infralittoral	Hap_39	-
NBS1.12	Desmodoroidae	PP859908	28S	D2A/D3B	2022-10-21	Japan	Senaha	Sand	Infralittoral	Hap_40	-
NBS1.2	Chromadorida	PP859910	28S	D2A/D3B	2022-10-21	Japan	Senaha	Sand	Infralittoral	Hap_41	NBS1.3, NBS1.5, NBS2.11
NBS1.9	Desmodoridae	PP859909	28S	D2A/D3B	2022-10-21	Japan	Senaha	Sand	Infralittoral	Hap_42	-
NBS2.17	Paracanthonchus	PP859911	28S	D2A/D3B	2022-10-21	Japan	Senaha	Sand	Infralittoral	Hap_43	NBF3.5
NBS2.21	Chromadoridae	PP859912	28S	D2A/D3B	2022-10-21	Japan	Senaha	Sand	Infralittoral	Hap_44	-
NBS2.5	Rhabdodemania	PP859913	28S	D2A/D3B	2022-10-21	Japan	Senaha	Sand	Infralittoral	Hap_45	-
NBS2.8	Axonolaimidae	PP859914	28S	D2A/D3B	2022-10-21	Japan	Senaha	Sand	Infralittoral	Hap_46	-
NBS3.5	Monhysterina	PP859915	28S	D2A/D3B	2022-10-21	Japan	Senaha	Sand	Infralittoral	Hap_47	-
