# Supplementary material for: The tip of the iceberg: extraordinarily high diversity while examining two infralittoral nematode communities on Okinawa-jima Island, Japan, using morphology and DNA barcoding
Source: PeerJ. 2025 Jul 30;13:e19757. doi: 10.7717/peerj.19757 (PMC12317692; doi:10.7717/peerj.19757)
Supplement: Supplemental Information 7 [file peerj-13-19757-s007.xlsx]

## Sheet: Sheet1
		NMS1	NMS2	NMS3	NMC1	NMC2	NMC3	NMF1	NMF2	NMF3	KMS1	KMS2	KMS3	KMC1	KMC2	KMC3	KMF1	KMF2	KMF3
Abelbolla	sp.	0	1	0	2	0	0	0	0	0	0	0	0	0	1	0	0	1	0
Acanthopharynx	sp.	0	0	0	1	0	0	0	0	0	0	0	0	0	1	2	0	0	0
Anonchus	sp.	1	0	0	0	0	0	0	3	4	0	0	7	0	1	0	0	0	0
Anticoma	sp.	0	0	0	0	0	0	5	0	2	0	0	0	0	0	0	1	1	0
Anticomidae	sp.	3	0	0	1	1	2	0	4	0	0	0	0	0	0	0	0	0	0
Aponema	sp.	0	0	0	0	0	0	1	0	0	0	0	0	0	0	0	0	6	1
Axonolaimidae	sp.	0	0	0	0	6	1	0	0	0	0	0	0	0	0	0	0	0	0
Axonolaimus	sp.	0	0	0	0	0	0	0	5	0	0	0	0	0	0	0	0	0	0
Bendiella	sp.	0	0	0	0	0	0	4	1	2	0	0	0	0	0	0	0	0	0
Catanema	sp.	0	0	0	0	0	0	2	0	1	0	0	0	0	0	0	0	0	0
Cephalanticoma	sp.	2	0	3	0	0	0	1	5	1	0	0	4	0	0	0	1	0	0
Chromadora	sp.	0	0	0	0	1	0	0	1	0	5	0	0	0	0	1	0	0	0
Chromadorella	sp.	0	0	0	1	4	2	0	0	0	0	0	0	1	0	1	0	0	0
Chromadoridae		3	3	1	0	0	0	2	3	3	4	5	3	0	0	0	5	2	2
Chromadorita	sp.	1	2	0	0	0	1	0	0	0	0	0	0	0	0	0	0	0	0
Chromaspirina	sp.	1	2	4	3	1	3	4	0	0	0	0	0	0	0	0	0	0	0
Cobbia	sp.	0	0	0	1	1	1	0	0	0	0	0	0	0	0	0	0	0	0
Comesomatidae	sp.	0	0	0	0	0	0	2	0	0	0	0	0	0	0	0	1	0	0
Croconema	sp.	12	2	2	0	0	0	4	4	4	0	0	0	0	0	0	0	0	0
Cyatholaimidae		0	0	0	2	1	1	2	4	1	0	1	1	0	2	1	8	6	0
Cyatholaimus	sp.	3	3	0	0	0	2	0	0	0	1	2	5	0	0	0	0	0	0
Daptonema	sp.1	0	0	0	1	3	37	0	0	0	2	3	2	1	1	1	2	0	0
Daptonema	sp.2	7	7	11	0	3	0	0	7	0	1	2	4	0	0	0	8	4	0
Demonema	sp.	0	0	0	0	0	0	0	3	0	0	0	0	0	0	0	1	7	0
Desmodora	sp.1	0	7	3	1	1	2	0	1	9	0	0	0	0	0	0	0	0	0
Desmodora	sp.2	0	0	0	1	0	1	0	0	0	0	0	1	2	5	0	2	3	0
Desmodorella	sp.	0	0	0	0	0	0	0	0	0	0	0	0	0	0	0	1	0	0
Desmodoridae	sp.1	1	0	0	12	0	3	0	0	0	0	0	0	0	0	0	0	0	0
Desmodoridae		1	0	0	0	1	1	4	1	0	2	0	0	2	0	0	2	0	1
Desmolaimus	sp.	0	1	2	0	0	0	0	0	1	0	0	0	0	0	0	0	0	0
Dichromadora	sp.	5	1	1	0	0	0	1	0	0	0	0	0	0	0	0	0	0	0
Didelta	sp.	0	0	0	0	2	0	9	2	1	0	0	0	0	0	0	2	1	0
Enchelidiidae		3	8	10	0	0	0	0	6	1	0	0	0	0	0	0	1	1	5
Enoploides	sp.	0	0	0	4	1	0	0	0	0	0	0	6	1	0	0	0	0	0
Enoplolaimus	sp.	0	0	0	0	1	0	0	0	0	0	0	0	0	0	0	0	0	0
Epacanthion	sp.	0	0	1	0	1	1	0	0	0	0	0	0	0	1	0	0	0	0
Epsilonema	sp.	0	0	0	0	0	0	0	0	0	2	0	0	2	4	12	0	0	0
Ethmolaimidae		0	0	0	0	0	1	0	0	1	0	0	0	0	0	2	0	0	0
Euchromadora	sp.	6	5	2	3	0	1	0	0	0	0	0	0	0	0	0	0	0	0
Euchromadorinae		2	0	0	0	0	0	0	2	2	0	0	0	0	0	0	0	0	0
Eurystomina	sp.	3	0	0	0	0	0	0	0	0	1	5	3	0	7	0	0	2	0
Filoncholaimus	sp.	0	0	0	0	0	0	0	1	0	0	0	0	0	0	0	4	2	0
Gammanema	sp.	1	1	0	0	0	0	0	0	0	0	1	0	0	0	0	0	0	0
Halalaimus	sp.	0	0	0	0	0	0	0	1	0	0	0	0	0	2	0	1	0	2
Halichonolaimus	sp.	2	0	0	0	0	0	1	1	0	0	0	0	0	0	0	0	0	1
Hopperia		0	0	0	0	3	1	0	0	2	0	0	0	0	0	0	0	0	0
Laxus	sp.	0	0	0	4	1	1	1	0	1	0	1	0	0	0	0	1	0	0
Leptolaimidae	sp.	0	0	0	0	0	0	1	2	0	2	2	3	0	0	0	0	0	0
Linhomoeidae		1	0	0	0	1	0	0	1	24	2	9	13	0	3	1	4	16	7
Linhomoeidae	sp.1	0	0	0	0	0	0	0	0	0	3	1	0	0	0	1	0	0	0
Linhomoeidae	sp.2	0	0	0	0	0	0	3	1	1	0	0	0	0	0	0	0	0	0
Linhomoeus	sp.	0	0	0	0	0	0	0	0	0	1	2	1	0	0	0	0	0	0
Litinium	sp.	1	0	0	0	0	0	0	0	0	1	0	1	0	0	0	0	0	0
Marylynnia	sp.	1	0	0	2	0	1	0	4	0	0	2	8	0	1	0	0	0	0
Mesacanthoides	sp.	0	0	0	0	0	0	0	0	0	0	0	0	0	0	0	1	0	0
Metachromadora	sp.	0	0	0	0	0	0	0	0	1	0	0	0	1	0	0	5	1	0
Metacomesoma	sp.	0	0	0	0	0	0	0	0	0	0	0	0	0	0	0	1	0	0
Metadesmolaimus	sp.	0	0	0	0	0	0	0	0	0	0	0	1	0	0	0	1	0	0
Metalinhomoeus	sp.	0	0	0	0	0	0	0	0	0	0	0	0	0	0	0	2	1	3
Metasphaerolaimus	sp.	0	0	0	0	0	0	0	0	0	0	0	0	0	0	0	0	0	1
Meyersia	sp.	5	0	0	0	0	0	0	1	0	1	5	9	2	1	0	3	3	1
Microlaimidae		0	0	0	0	0	0	0	8	1	0	0	0	0	0	0	0	0	0
Microlaimus	sp.	2	1	1	0	7	4	0	0	0	0	0	0	0	0	0	0	0	0
Molgolaimus	sp.	0	0	0	0	0	0	5	4	3	0	0	0	0	0	0	14	2	6
Monhystera	sp.	0	0	0	0	0	0	1	0	0	0	0	0	0	0	0	0	0	0
Monhysteridae	sp.	2	1	1	0	2	0	5	2	3	0	0	0	0	0	0	0	1	0
Monoposthia	sp.	0	0	1	0	0	0	0	0	0	0	5	1	0	0	0	0	0	0
Monoposthiidae	sp.	0	0	0	1	0	0	0	0	0	0	0	0	0	3	5	0	0	0
Nannolaimoides	sp.	0	0	0	0	1	0	0	0	0	0	0	0	0	0	0	0	0	0
Neochromadora	sp.	1	1	5	1	5	3	2	1	0	0	0	0	0	1	0	0	0	0
Neotonchus	sp.	0	0	0	1	5	1	0	0	0	0	0	0	0	0	0	0	0	5
Notochaetosoma	sp.	0	0	0	2	0	0	0	0	1	0	0	0	0	0	0	0	0	0
Odontophora	sp.	1	1	1	0	0	0	3	1	1	0	0	0	0	0	0	3	2	0
Oncholaimidae		4	4	0	0	0	0	2	0	0	0	0	0	0	0	0	3	0	0
Paracanthonchus	sp.	0	3	0	0	0	0	6	11	0	0	1	0	0	0	0	5	0	0
Paracomesoma	sp.	0	0	2	0	0	0	0	0	0	0	0	0	0	0	0	0	0	0
Paramesonchium	sp.	0	0	0	0	2	2	0	0	0	0	0	0	0	0	0	0	0	0
Paramonhystera	sp.	0	0	0	0	0	0	7	2	1	0	0	0	0	0	0	0	0	0
Parapinnanema	sp.	0	0	0	0	0	0	0	0	0	0	5	0	0	0	0	2	11	4
Pareurystomina	sp.	0	13	12	3	31	1	0	0	0	0	0	0	0	0	0	0	0	0
Parodonthophora	sp.	0	0	0	4	2	4	0	0	0	0	0	0	0	0	0	0	0	0
Perepsilonema	sp.	0	0	0	0	0	0	0	0	0	0	0	0	0	0	1	0	0	0
Phanodermatidae		0	0	0	0	0	0	1	0	0	0	0	0	0	0	0	0	1	0
Phanodermopsis	sp.	0	0	0	0	0	0	6	1	1	0	0	0	0	0	0	0	0	0
Pomponema	sp.	0	0	0	1	1	0	1	0	0	0	0	0	0	0	0	3	0	0
Prochromadorella	sp.	3	0	0	0	0	0	0	0	0	2	12	6	0	0	0	0	0	0
Prooncholaimus	sp.	0	0	0	0	0	0	2	1	0	0	0	0	0	0	0	0	0	0
Ptycholaimus	sp.	0	0	0	0	0	0	0	1	1	0	0	0	0	0	0	0	0	0
Rhabdodemania	sp.	0	0	4	0	0	0	0	0	0	0	0	0	0	0	0	2	0	4
Rhinema	sp.	1	0	0	0	0	0	0	0	1	0	0	0	0	0	0	0	0	0
Sabatieria	sp.	0	0	0	1	0	0	0	0	0	0	0	0	0	0	0	0	0	0
Selachinematidae	sp.	1	0	0	0	0	1	0	0	0	0	0	0	0	0	0	0	0	2
Sphaerolaimidae	sp.	0	0	0	0	0	0	0	0	0	0	0	0	0	1	0	0	0	0
Spilophorella	sp.	5	3	4	3	6	3	0	0	0	1	5	1	0	0	0	0	0	0
Spirinia	sp.	2	0	0	0	0	0	0	4	0	0	2	0	0	0	0	1	6	1
Steineria	sp.	0	0	0	1	0	0	0	0	1	0	0	0	0	0	0	0	0	0
Theristus	sp.	1	0	0	0	1	3	0	0	0	0	0	0	0	0	0	0	0	0
Thoracostomopsidae		0	0	0	0	1	0	0	1	0	0	0	0	0	0	0	0	0	0
Trefusiidae		0	0	1	0	0	0	0	2	0	0	0	1	0	0	0	0	0	0
Tricoma	sp.	0	0	0	0	0	0	0	1	0	0	0	0	0	2	1	0	0	1
Vasostoma	sp.	1	16	3	0	0	0	0	2	0	37	0	0	0	0	0	0	0	1
Viscosia	sp.	2	5	4	21	8	0	2	2	4	0	0	0	0	0	0	1	0	0
Xyalidae		3	2	1	1	0	0	0	1	1	1	4	2	0	0	1	1	0	0
Zalonema	sp.	0	0	0	2	0	0	1	0	0	0	1	0	0	0	0	0	0	0
Monhysterida		2	0	0	0	0	0	0	1	0	0	0	0	0	0	0	0	0	0
Nematoda	indet.	0	0	0	0	0	0	0	3	5	1	2	4	0	0	0	0	5	0
